# Supplementary material for: Photodynamic Activation of Cholecystokinin 1 Receptor Is Conserved in Mammalian and Avian Pancreatic Acini
Source: Biomedicines. 2023 Mar 13;11(3):885. doi: 10.3390/biomedicines11030885 (PMC10046250; doi:10.3390/biomedicines11030885)
Supplement: Supplementary file 1 [file biomedicines-11-00885-s001.zip › biomedicines-2180601-supplementary.pdf]

## Article

# Photodynamic Activation of Cholecystokinin 1 Receptor Is Conserved in Mammalian and Avian Pancreatic Acini

Jie Wang and Zong Jie Cui \*

Institute of Cell Biology, Beijing Normal University, Beijing 100875, China; 15321227265@126.com

\* Correspondence: zjcui@bnu.edu.cn; Tel.: +86-10-5880-9162

## Supplemental Materials

Immunocytochemistry confirmed CCK1R localization at the basolateral plasma membrane in isolated mouse pancreatic acini (Fig. S1A).

In perfused mouse pancreatic acini, CCK 1 pM was found to have no effect, but CCK 3 and 10 pM induced conspicuous calcium oscillations, CCK 30 pM produced a phasic increase (Fig. S1Ba). Continued perfusion with CCK 10 pM triggered regular calcium oscillations (Fig. S1Bb). A clear dose-response curve for CCK stimulation was found (Fig. S1Bc).

After CCK 10 pM-induced calcium spikes in mouse pancreatic acini were washed out, the addition of SALPC 1  $\mu$ M alone had no effect on basal calcium (Fig. S1Ca). However, after sequential CCK 10 pM (calcium oscillations) and SALPC 1  $\mu$ M (no effect), red LED light (675 nm, 50 mW·cm<sup>-2</sup>, 1.5 min) elicited fresh calcium oscillations (Fig. S1Cb). If experiment shown in Fig. S1Cb (sequential CCK 10 pM; SALPC 1  $\mu$ M; 675 nm, 50 mW·cm<sup>-2</sup>, 1.5 min) was repeated in the presence of <sup>1</sup>O<sub>2</sub> quencher Trolox C 300  $\mu$ M, no discernible calcium spikes were observed after LED light irradiation, although subsequent CCK 10 pM induced robust calcium oscillations (Fig. S1Cc). Statistical analysis of data from multiple experiments confirmed that SALPC photodynamic action (SALPC 1  $\mu$ M, 675 nm, 50 mW·cm<sup>-2</sup>, 1.5 min) triggered calcium increases, which were blocked by the presence of Trolox C (Fig. S1Cd,  $P < 0.05$ ).

The calcium oscillations induced by photodynamic action (SALPC 1  $\mu$ M; 675 nm, 50 mW·cm<sup>-2</sup>, 1.5 min) were blocked reversibly by CCK1R antagonist devazepide 3 nM (Fig. 2Ce), with statistical significance ( $P < 0.05$ , Fig. S1Cf).

In control experiments, it was found that CCK 10 pM-induced calcium oscillations in mouse pancreatic acini were blocked by CCK1R antagonist devazepide 3 nM (Fig. S1Cg), but <sup>1</sup>O<sub>2</sub> quencher Trolox C 300  $\mu$ M was without any effect on CCK stimulation (Fig. S1Ch). Such difference was confirmed in statistical analysis (Fig. S1Ci).

SALPC therefore photodynamically activated mouse pancreatic acinar cell CCK1R, most likely via <sup>1</sup>O<sub>2</sub>.

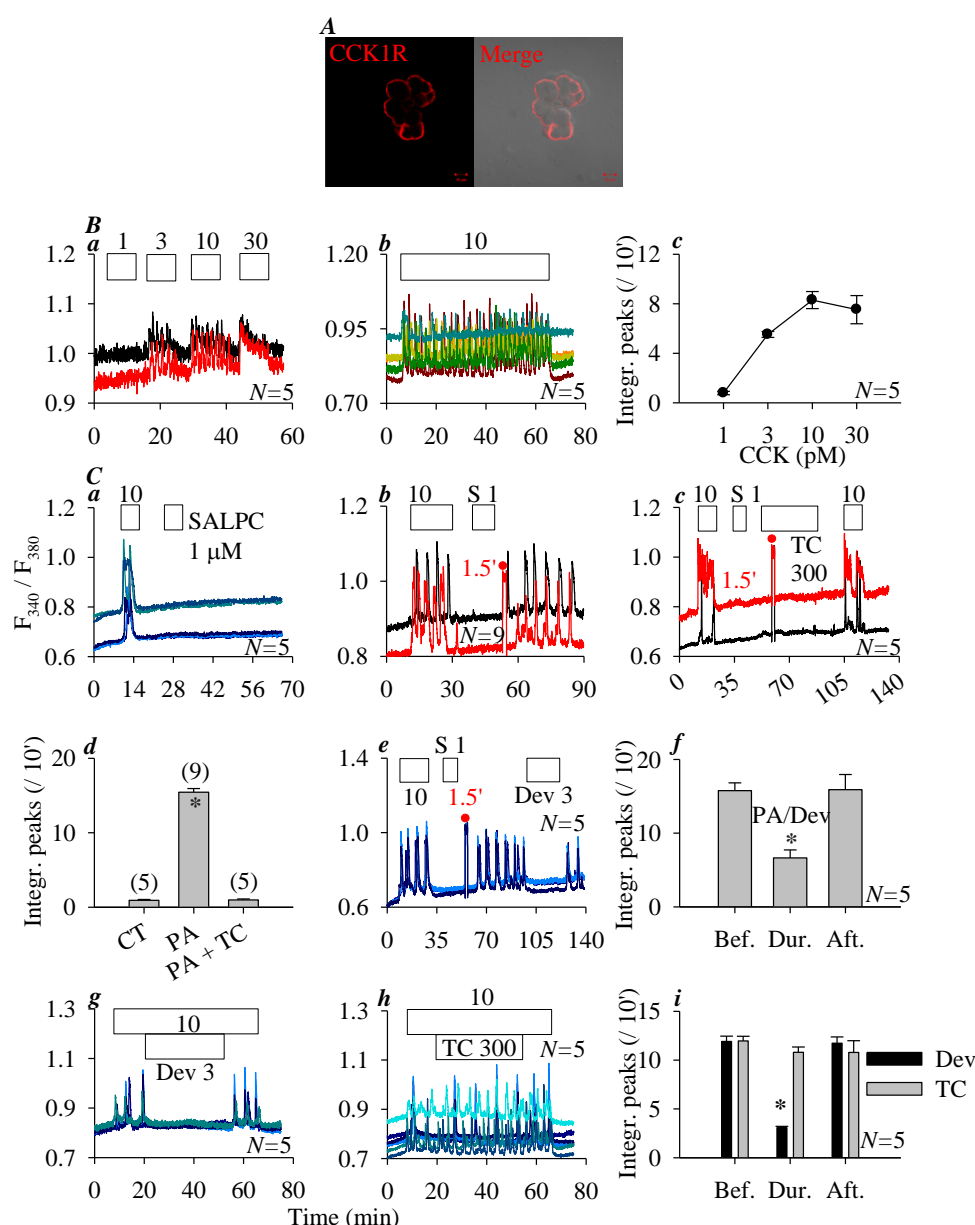

**Figure S1. Photodynamic CCK1R activation in mouse pancreatic acini** Pancreatic acini isolated from Kunming mouse were fixed and processed for immunocytochemistry, incubated with goat anti-human CCK1R<sup>242-257</sup> primary antibody, and subsequently with TRITC-conjugated donkey anti-goat secondary antibody. Shown are fluorescent (red) and merged (with bright field) images (**A**). Confocal images were taken in a Zeiss LSM 510 META (objective 63  $\times$  / 1.40 oil) with  $\lambda_{\text{ex}}$  543 nm. Scale bars 10  $\mu$ m. Pancreatic acini loaded with Fura-2 were perfused in Sykes-Moore chamber, CCK was added sequentially at 1, 3, 10, and 30 pM as indicated by the horizontal bars (**Ba**). Continued exposure to CCK 10 pM elicited regular calcium oscillations (**Bb**). The calcium peak areas above the baseline in typical original calcium tracings as shown in (**Ba**) were calculated (for 10 min) (5-15, 20-30, 35-45, and 50-60 min) from multiple repeat experiments and plotted in (**Bc**) ( $N = 5$ ). CCK, SALPC, devazepide (Dev), Trolox C (TC), and LED light (675 nm, 50 mW $\cdot$ cm<sup>-2</sup>, 1.5 min) were applied as indicated by the horizontal bars in (**Ca-Cc**). (**Ca**) CCK 10 pM, SALPC 1  $\mu$ M. (**Cb**) CCK 10 pM, SALPC 1  $\mu$ M, LED light (1.5 min). (**Cc**) CCK 10 pM, SALPC 1  $\mu$ M, Trolox C (TC) 300  $\mu$ M, LED light (1.5 min), CCK 10 pM. Integrated calcium peaks (above baseline) during (35-65 min in **Ca**, 55-85 min in **Cb**, 65-95 min in **Cc**) were calculated from multiple repeat experiments ( $N = 5-9$ ) and statistical data presented (**Cd**). (**Ce**) CCK 10 pM, SALPC 1  $\mu$ M, LED light (1.5 min at red dot), devazepide (Dev) 3 nM. Integrated calcium peak areas above baseline (per 10 min) in calcium tracings as shown in (**Ce**) before, during, and after devazepide (Dev) were calculated from multiple repeat experiments ( $N = 5$ ) and statistical data presented in (**Cf**). (**Cg**) CCK 10 pM, devazepide (Dev) 3 nM; (**Ch**) CCK 10 pM, Trolox C (TC) 300  $\mu$ M. Integrated calcium peak areas above baseline (per 10 min) in calcium tracings shown in (**Cg**, **Ch**), before, during, and after devazepide or Trolox C were calculated from repeat experiments ( $N = 5$ ) done on different days with pancreatic acini isolated from different mice, and statistical data presented in (**Ci**). Student's T-test was performed, asterisk (\*) indicates statistical significance at  $P < 0.05$  (**Cd**, **Cf**, **Ci**,  $N = 5-9$ ). The original calcium tracings are each from one of  $N$  identical experiments. Each color-coded trace is representative of one individual pancreatic cell (as one region of interest – ROI, in the optical field). The abscissa in panels (**Ba**, **Bb**, **Ca-Cc**, **Ce**, **Cg**, **Ch**) are time in min as indicated.
